# Supplementary material for: Control of human VDAC-2 scaffold dynamics by interfacial tryptophans is position specific
Source: PubMed Central journal article supplement (PMC5091009; doi:10.1016/j.bbamem.2016.09.011), 2016-12
Supplement: mmc1.pdf [file mmc1.pdf]

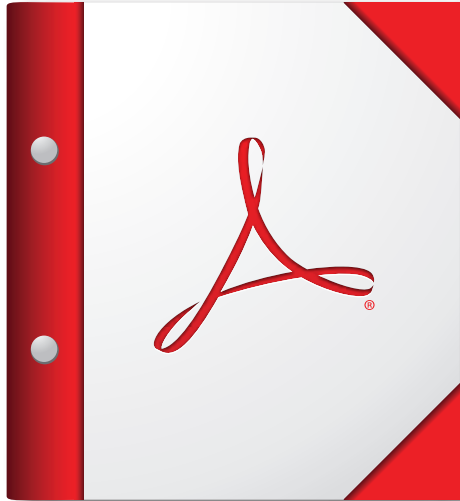

**For the best experience, open this PDF portfolio in  
Acrobat 9 or Adobe Reader 9, or later.**

[Get Adobe Reader Now!](#)
